# Supplementary material for: High-resolution mass spectrometry for exploring metabolic signatures of sepsis-induced acute kidney injury
Source: Royal Society of Chemistry journal article supplement (doi:10.1039/c6ra01192f), 2016-01-01
Supplement: c6ra01192f1.pdf [file c6ra01192f1.pdf]

**Table S1.** Demographic and baseline characteristics of the subjects enrolled in the study.

| <b>Parameter</b>                     | <b>Patients (n = 106)</b> | <b>Healthy volunteers (n = 101)</b> | <b>P value #</b> |
|--------------------------------------|---------------------------|-------------------------------------|------------------|
| Age, years                           | 58±5                      | 56±4                                | 0.77             |
| Sex (male/female)                    | 55/51                     | 51/50                               | 0.83             |
| Days in the ICU                      | 7±2                       | none                                | 0.00             |
| Body mass index (kg/m <sup>2</sup> ) | 23.35±5.19                | 24.76±6.34                          | 0.76             |
| APACHE II                            | 16.0±2.7                  | 6.70±2.01                           | 0.02             |
| SOFA-24h                             | 7.29±1.34                 | 2.06±0.39                           | 0.01             |
| Hemoglobin (g/dl)                    | 11.17±4.04                | 14.28±3.70                          | 0.11             |
| Leukocytes (x10 <sup>9</sup> /l)     | 14.06±1.38                | 19.20±4.63                          | 0.04             |
| Platelets (x10 <sup>9</sup> /l)      | 187.0±34.27               | 280.4±68.24                         | 0.00             |
| PCR (mg/l)                           | 187±38                    | 267±49                              | 0.01             |
| PCT (ng/ml)                          | 3.2±0.4                   | 1.4±0.1                             | 0.01             |
| Urea (mg/dl)                         | 66±12                     | 51±10                               | 0.06             |

Note: ICU intensive care unit, APACHE II Acute Physiology and Chronic Health Evaluation II, SOFA Sequential Organ Failure Assessment, PCT procalcitonin, PCR reactive C protein. \*p values <0.05.

**Table S2.** Information of SIALI marker metabolites detected by high-resolution mass spectrometry

| No | Rt (min) | m/z      | Compound ID | Formula                                                       | Ppm   | Description          | p      | VIP   | Trend | AUC   | Sensitivity | Specificity |
|----|----------|----------|-------------|---------------------------------------------------------------|-------|----------------------|--------|-------|-------|-------|-------------|-------------|
| 1  | 2.93     | 248.1129 | HMDB02095   | C <sub>10</sub> H <sub>17</sub> NO <sub>6</sub>               | 0.13  | Malonylcarnitine     | 0.0000 | 16.33 | ↑     | 0.995 | 97.0        | 96.3        |
| 2  | 2.11     | 147.0770 | HMDB03423   | C <sub>5</sub> H <sub>10</sub> N <sub>2</sub> O <sub>3</sub>  | 0.87  | D-Glutamine          | 0.0000 | 17.18 | ↑     | 0.987 | 96.9        | 97.5        |
| 3  | 4.43     | 212.0901 | HMDB01434   | C <sub>10</sub> H <sub>13</sub> NO <sub>4</sub>               | -0.79 | 3-Methoxytyrosine    | 0.0000 | 18.17 | ↑     | 0.961 | 85.8        | 96.2        |
| 4  | 7.40     | 225.0861 | HMDB12819   | C <sub>10</sub> H <sub>12</sub> N <sub>2</sub> O <sub>4</sub> | -0.91 | 5-Hydroxykynurenine  | 0.0000 | 19.82 | ↑     | 0.874 | 83.1        | 87.2        |
| 5  | 4.55     | 151.0619 | HMDB13141   | C <sub>6</sub> H <sub>6</sub> N <sub>4</sub> O                | 1.20  | 1-Methylhypoxanthine | 0.0000 | 19.26 | ↓     | 0.854 | 86.0        | 84.6        |
| 6  | 1.67     | 118.0865 | HMDB00883   | C <sub>5</sub> H <sub>11</sub> NO <sub>2</sub>                | 1.08  | L-Valine             | 0.0000 | 30.12 | ↓     | 0.833 | 85.8        | 82.5        |

Note: a, all compounds are verified with an authentic standard.
